# Supplementary material for: ‘Degraded’ RNA profiles in Arthropoda and beyond
Source: PubMed Central journal article supplement (PMC4671170; doi:10.7717/peerj.1436), 2015-12-01
Supplement: peerj-03-1436-s002.pdf [file peerj-03-1436-s002.pdf]

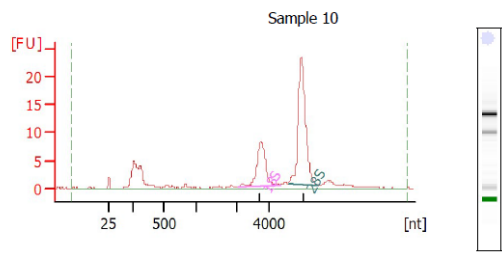

**Overall Results for sample 10 :** Sample 10

RNA Area: 135.6  
 RNA Concentration: 166 ng/μl  
 rRNA Ratio [28s / 18s]: 2.2  
 RNA Integrity Number (RIN): 9.2 (B.02.08)  
 Result Flagging Color:   
 Result Flagging Label: RIN: 9.20

**Fragment table for sample 10 :** Sample 10

| Name | Start Size [nt] | End Size [nt] | Area | % of total Area |
|------|-----------------|---------------|------|-----------------|
| 18S  | 2,085           | 4,655         | 25.3 | 18.6            |
| 28S  | 5,157           | 6,996         | 54.7 | 40.3            |

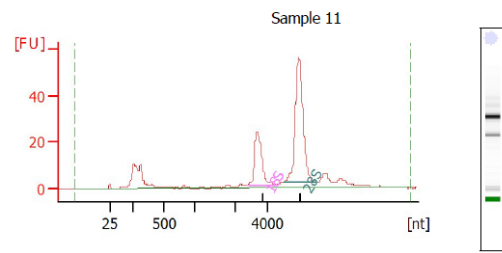

**Overall Results for sample 11 :** Sample 11

RNA Area: 353.7  
 RNA Concentration: 433 ng/μl  
 rRNA Ratio [28s / 18s]: 2.3  
 RNA Integrity Number (RIN): 9.4 (B.02.08)  
 Result Flagging Color:   
 Result Flagging Label: RIN: 9.40

**Fragment table for sample 11 :** Sample 11

| Name | Start Size [nt] | End Size [nt] | Area  | % of total Area |
|------|-----------------|---------------|-------|-----------------|
| 18S  | 2,786           | 4,613         | 59.7  | 16.9            |
| 28S  | 5,038           | 7,055         | 134.9 | 38.1            |

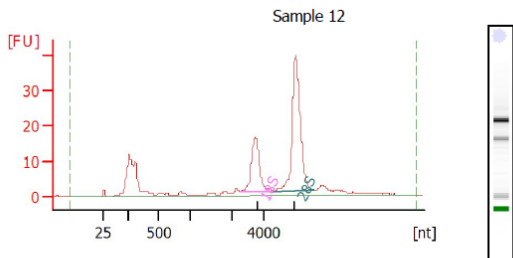

**Overall Results for sample 12 :** Sample 12

RNA Area: 282.4  
 RNA Concentration: 346 ng/μl  
 rRNA Ratio [28s / 18s]: 2.2  
 RNA Integrity Number (RIN): 9.2 (B.02.08)  
 Result Flagging Color:   
 Result Flagging Label: RIN: 9.20

**Fragment table for sample 12 :** Sample 12

| Name | Start Size [nt] | End Size [nt] | Area | % of total Area |
|------|-----------------|---------------|------|-----------------|
| 18S  | 2,527           | 4,591         | 44.8 | 15.9            |
| 28S  | 4,634           | 7,020         | 97.5 | 34.5            |
